# Supplementary material
Source: publisher figshare collection journal article supplement (https://karger.figshare.com/articles/dataset/_/4236197)
Supplement: Supplementary file 1 [file 1]

Archive with 7 entries (7 files):
- JIN450955_FigS1.pdf
- JIN450955_FigS2.pdf
- JIN450955_FigS3.pdf
- JIN450955_FigS4.pdf
- JIN450955_FigS5.pdf
- JIN450955_Suppl_Legends.docx
- JIN450955_TableS1.pdf
