# Supplementary material
Source: publisher figshare collection journal article supplement (https://karger.figshare.com/articles/dataset/_/4236197)
Supplement: Supplementary file 1 [file 1 › JIN450955_FigS1.pdf]

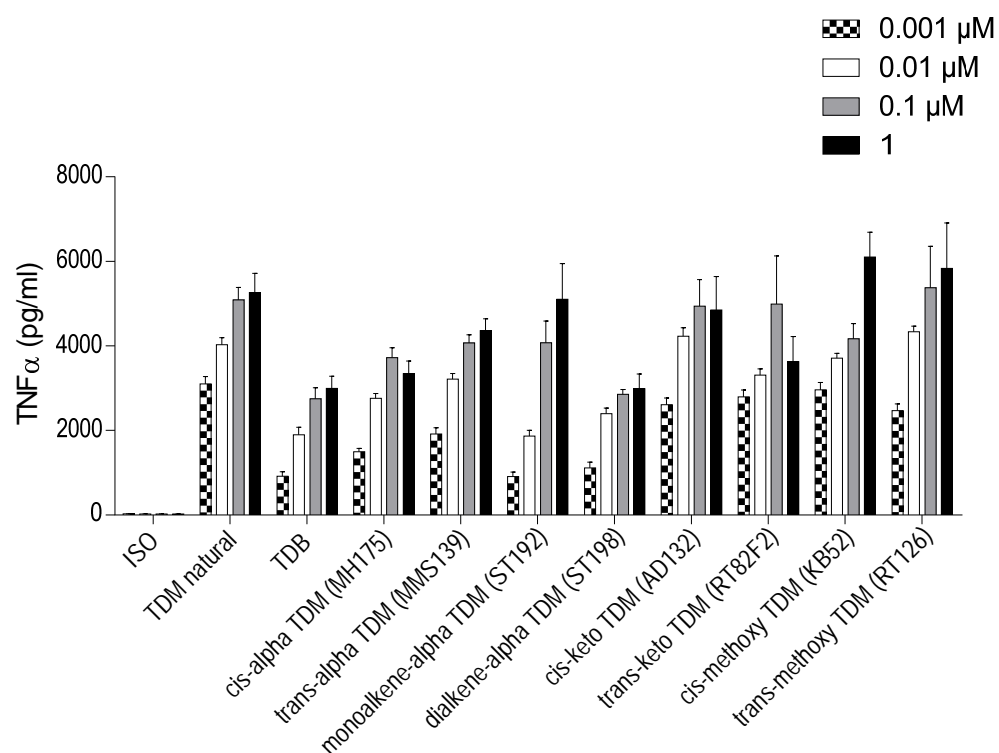

**Figure S1:** Synthetic trehalose dimycolate esters stimulate the *in vitro* production of TNF- $\alpha$  by Bone Marrow derived Dendritic Cells (BMDCs).
