# Supplementary material
Source: publisher figshare collection journal article supplement (https://karger.figshare.com/articles/dataset/_/4236197)
Supplement: Supplementary file 1 [file 1 › JIN450955_FigS5.pdf]

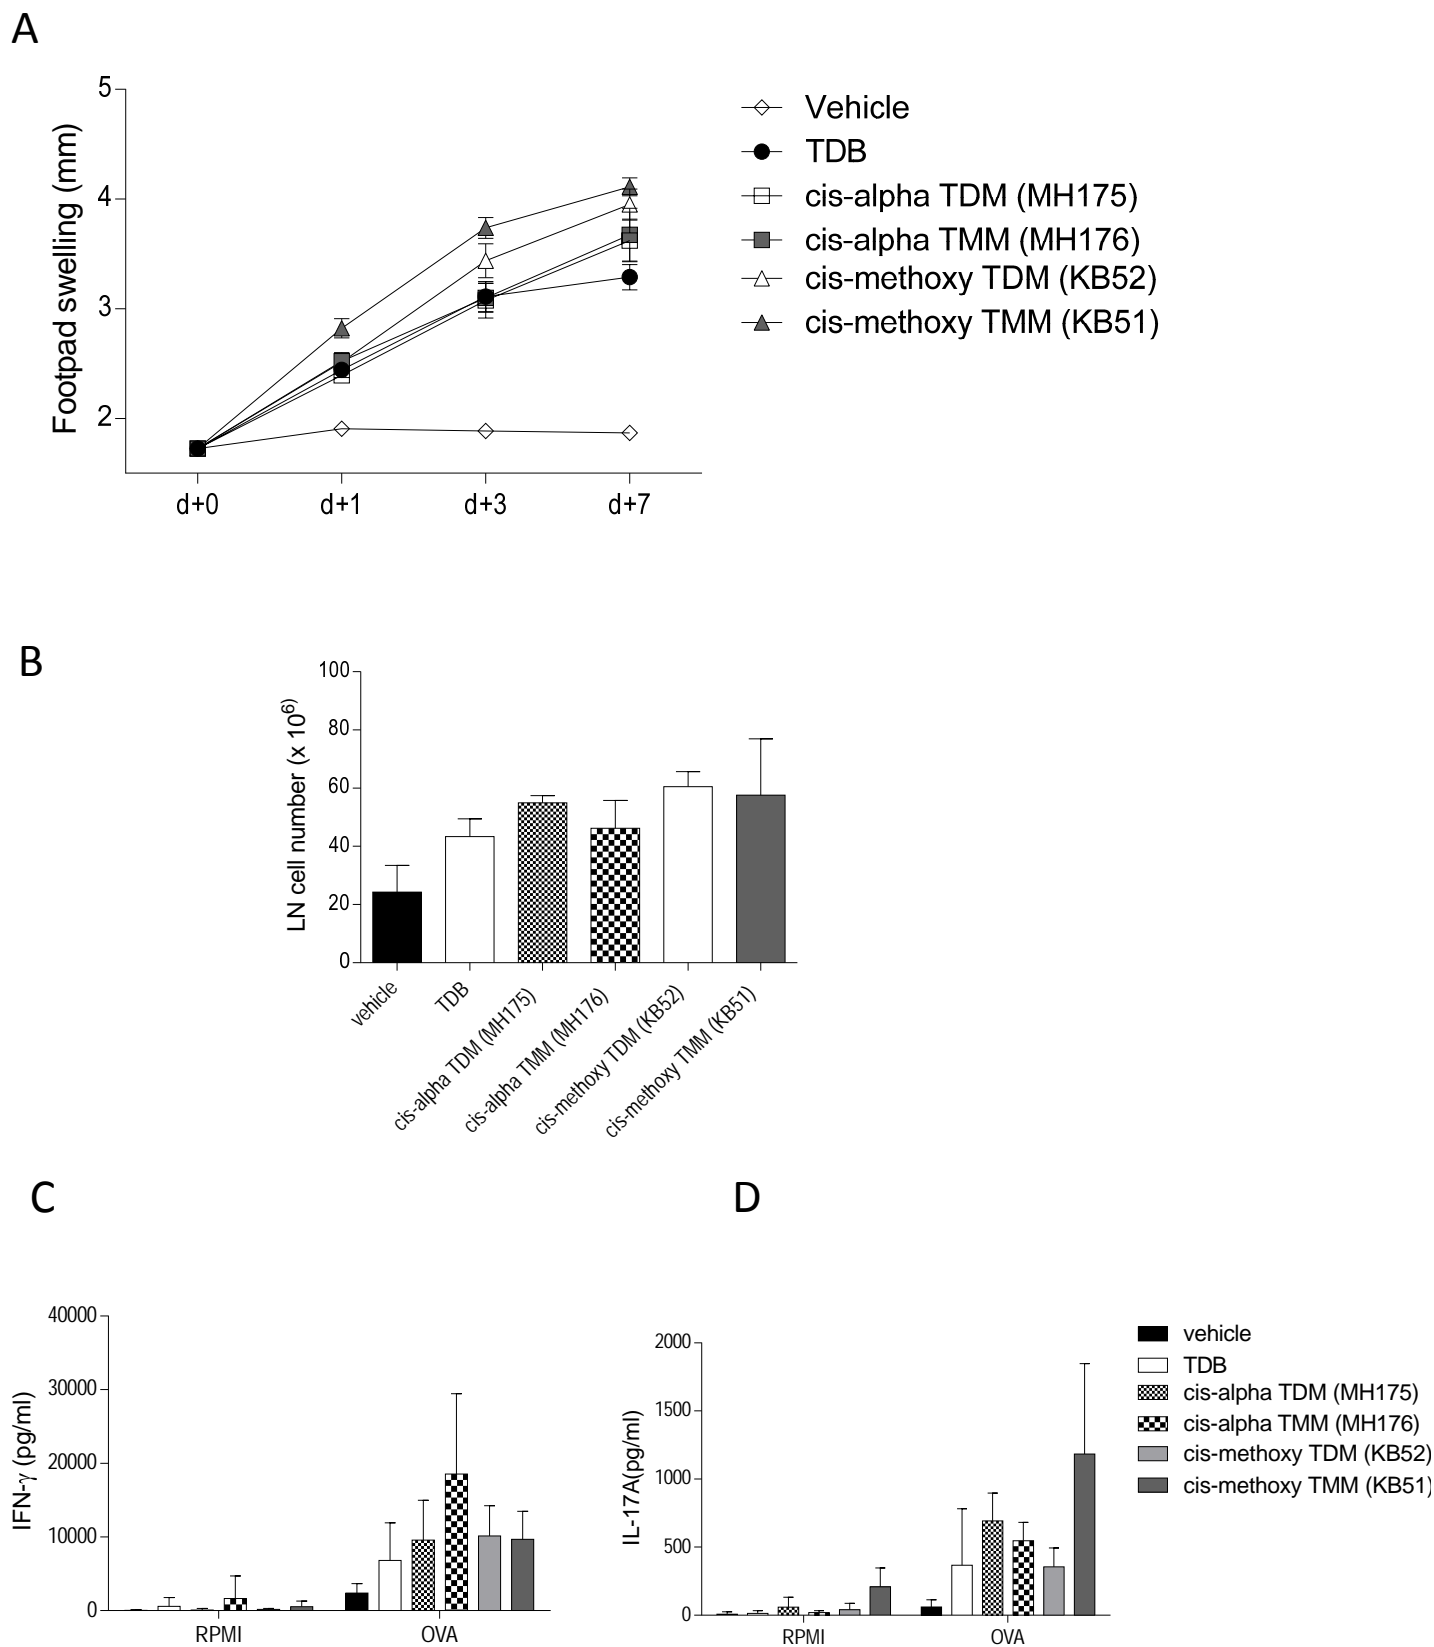

**Figure S5: *In vivo* inflammatory properties of synthetic mycolate esters and adjuvant potential.**
