# Supplementary material
Source: publisher figshare collection journal article supplement (https://karger.figshare.com/articles/dataset/_/4236197)
Supplement: Supplementary file 1 [file 1 › JIN450955_Suppl_Legends.docx]

**Table S1. All the tested synthetic trehalose mycolate esters induce the production of TNF-alpha and IL-6 by Bone Marrow derived Dendritic Cells (BMDCs)**

BMDCs derived from C57BL/6 mice were stimulated for 24 h in triplicate with 10 µg/mL of plate-coated synthetic trehalose mycolate esters or controls (TDB, TDM natural mix or evaporated isopropanol (ISO)). The supernatants were harvested individually and the amount of pro-inflammatory TNF-alpha and IL-6 was determined by sandwich ELISA. Results are expressed as mean pg/mL of cytokines ± SD of triplicate cultures and representative of at least three independent experiments.

**Figure S1: Synthetic trehalose dimycolate esters of different classes and configuration stimulate the *in vitro* production of TNF-α by Bone Marrow derived Dendritic Cells (BMDCs).**

BMDCs cultures derived from C57BL/6 mice were stimulated for 24h in triplicate with single TDMs representative of the different classes and configurations (*cis* vs *trans*) of mycolates present in mycobacteria at escalating doses of 0.001µM (black and white bars), 0.01µM (white bars), 0.1 µM (grey bars) or 1µM (black bars), with evaporated isopropanol as negative control and TDB and a natural mix of TDM at the same concentrations as positive controls. The supernatants were harvested and the amount of TNF-α was determined by sandwich ELISA. Results are expressed as mean pg/mL of TNF-α ± SD and data of 4 representative experiments have been pooled.

**Figure S2.** **Synthetic glucose monomycolates and arabinose monomycolates activate BMDCs.**

BMDCs from C57BL/6 mice were stimulated for 24 h in triplicate with 1µM of plate-coated synthetic GMMs, AraMMs or controls (TDB or evaporated isopropanol (ISO)) Supernatants were harvested and the amount of TNF-α was determined by ELISA. Results are expressed as mean pg/mL of TNF-α ± SD and data of 3 representative experiments have been pooled.

**Figure S3. TDMs activate BMDCs by Mincle dependent mechanisms.**

BMDCs from C57BL/6 WT, FcRγ-/- , and Mincle-/- mice were stimulated in triplicate with 10 µg/mL of different synthetic trehalose dimycolates, TDB, natural TDM mix or negative control (evaporated isopropanol) for 24 h. The supernatants were analyzed for their content in pro-inflammatory cytokines (TNF-α) by ELISA. Results are expressed as mean pg/mL of TNF-α ± SD of triplicate cultures and data are representative of at least 4 independent experiments.

**Figure S4.** **Mechanisms involved in the activation of inflammasome by GMM and AraMM**

**A-D:** BMDCs from C57BL/6 mice were primed with 1µg/mL of ultrapure LPS for 2 h, pretreated 1 h or not (black bars) with 10 µM of Ebselen (A-grey bars), with 50 µM of glibenclamide (B-grey bars) or 50mM of KCl (B-white bars) or with 10µM of CA-074 (C-grey bars) or 1 µM of cytochalasin D (D-grey bars) and stimulated 5 h with 10µg/mL of synthetic mycolate esters and controls. The level of IL-1β was determined in the supernatant by ELISA. Results are means ± SD of triplicate cultures and representative of at least three independent experiments.

**Figure S5. *In vivo* inflammatory properties of synthetic mycolate esters and adjuvant potential.**

C57BL/6 mice were injected s.c in the hind footpads with w/o/w emulsions composed of 30% Incomplete Freund’s Adjuvant, 10µg/mouse of specified synthetic mycolate esters and 50 µg/mouse of ovalbumin. In the emulsion of the vehicle control group no glycolipid was present, in the TDB control group 10 µg/mouse of TDB replaced synthetic glycolipid in the emulsion**.**

**A:** footpad swelling measured with a caliper on the day of injection and 1, 3 and 7 days after injection. B: cell counts in the lymph nodes draining the injection site 7 days post administration

**C** and **D:** IFN-γ and IL-17A concentrations measured by ELISA on 72h supernatants of pooled popliteal and inguinal lymph node cells stimulated with culture medium (RPMI) or with 5 µg/mL of ovalbumin (OVA).
