# Supplementary material
Source: publisher figshare collection journal article supplement (https://karger.figshare.com/articles/dataset/_/4236197)
Supplement: Supplementary file 1 [file 1 › JIN450955_TableS1.pdf]

| Glycolipids (10µg/ml)        | TNF-alpha (pg/ml) |      | IL-6 (pg/ml) |     |
|------------------------------|-------------------|------|--------------|-----|
|                              | means             | SD   | means        | SD  |
| ISO                          | bdl               | bdl  | 33           | 10  |
| TDM natural mix              | 8902              | 1108 | 546          | 44  |
| Trehalose dibehenate         | 6994              | 1271 | 562          | 85  |
| cis-alpha TDM(JRMM337)       | 4389              | 1899 | 164          | 31  |
| trans-alpha TDM (MMS144)     | 1560              | 474  | 143          | 24  |
| trans-alpha TDM (MMS139)     | 1214              | 270  | 163          | 25  |
| monoalkene-TDM (ST192)       | 4188              | 189  | 354          | 159 |
| dialkene-TDM (ST198)         | 1867              | 246  | 168          | 40  |
| cis-keto TDM (RT137)         | 3624              | 500  | 428          | 32  |
| cis-keto TDM (AD132)         | 2267              | 1266 | 501          | 39  |
| trans-keto TDM (RT82)        | 3569              | 522  | 221          | 70  |
| cis-methoxy TDM (KB52)       | 11427             | 1012 | 735          | 18  |
| cis-methoxy TDM (KB50)       | 6004              | 747  | 317          | 22  |
| cis-methoxy TDM (AD104)      | 13802             | 945  | 1030         | 111 |
| cis-methoxy TDM (JRMM324)    | 6379              | 1575 | 752          | 125 |
| cis-methoxy-MA TDM (KB91)    | 4363              | 538  | 829          | 46  |
| trans-methoxy TDM (RT126)    | 2503              | 389  | 428          | 32  |
| hydroxy TDM (RT141)          | 2387              | 128  | 416          | 32  |
| alpha and methoxy TDM (KB55) | 6699              | 1737 | 358          | 46  |
| cis-alpha TMM (JRMM336)      | 3489              | 616  | 304          | 61  |
| trans-alpha TMM (MMS146)     | 3487              | 525  | 87           | 20  |
| trans-alpha TMM (MMS140)     | 3732              | 243  | 163          | 15  |
| monoalkene-TMM (ST165)       | 6467              | 931  | 447          | 19  |
| dialkene-TMM (ST196)         | 2689              | 520  | 477          | 76  |
| cis-keto TMM (RT136)         | 2460              | 90   | 471          | 39  |
| cis-keto TMM (AD134)         | 6286              | 747  | 471          | 87  |
| trans-keto TMM (RT86)        | 5167              | 935  | 485          | 49  |
| cis-methoxy TMM (KB51)       | 2010              | 248  | 672          | 62  |
| cis-methoxy TMM (KB49)       | 3441              | 426  | 948          | 11  |
| cis-methoxy TMM (AD118)      | 10562             | 1520 | 730          | 91  |

**Supplementary Table1: All the tested synthetic trehalose mycolate esters activate Bone Marrow derived Dendritic Cells (BMDCs)**
