# Supplementary material
Source: publisher figshare collection journal article supplement (https://karger.figshare.com/articles/dataset/_/4236197)

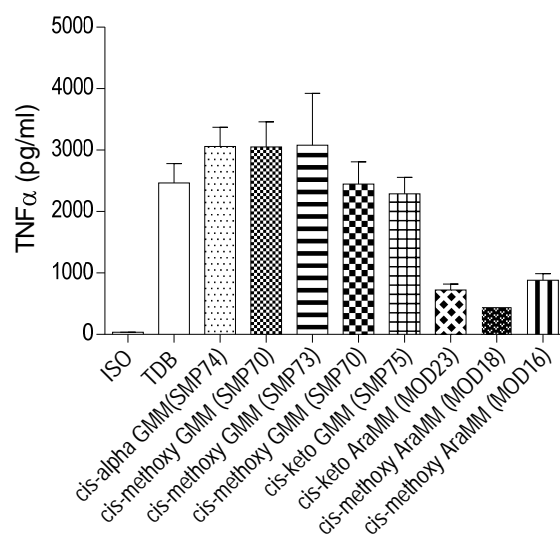

**Figure S2. Synthetic glucose monomycolates and arabinose monomycolates activate BMDCs**

Supplement: Supplementary file 1 [file 1 › JIN450955_FigS2.pdf]

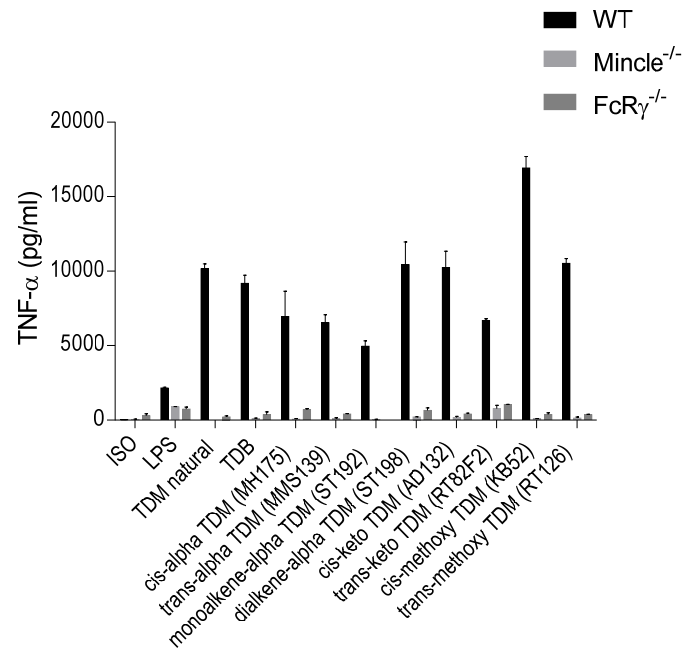

**Figure S3: TDMs activate BMDCs by Mincle dependent mechanisms**

Supplement: Supplementary file 1 [file 1 › JIN450955_FigS3.pdf]

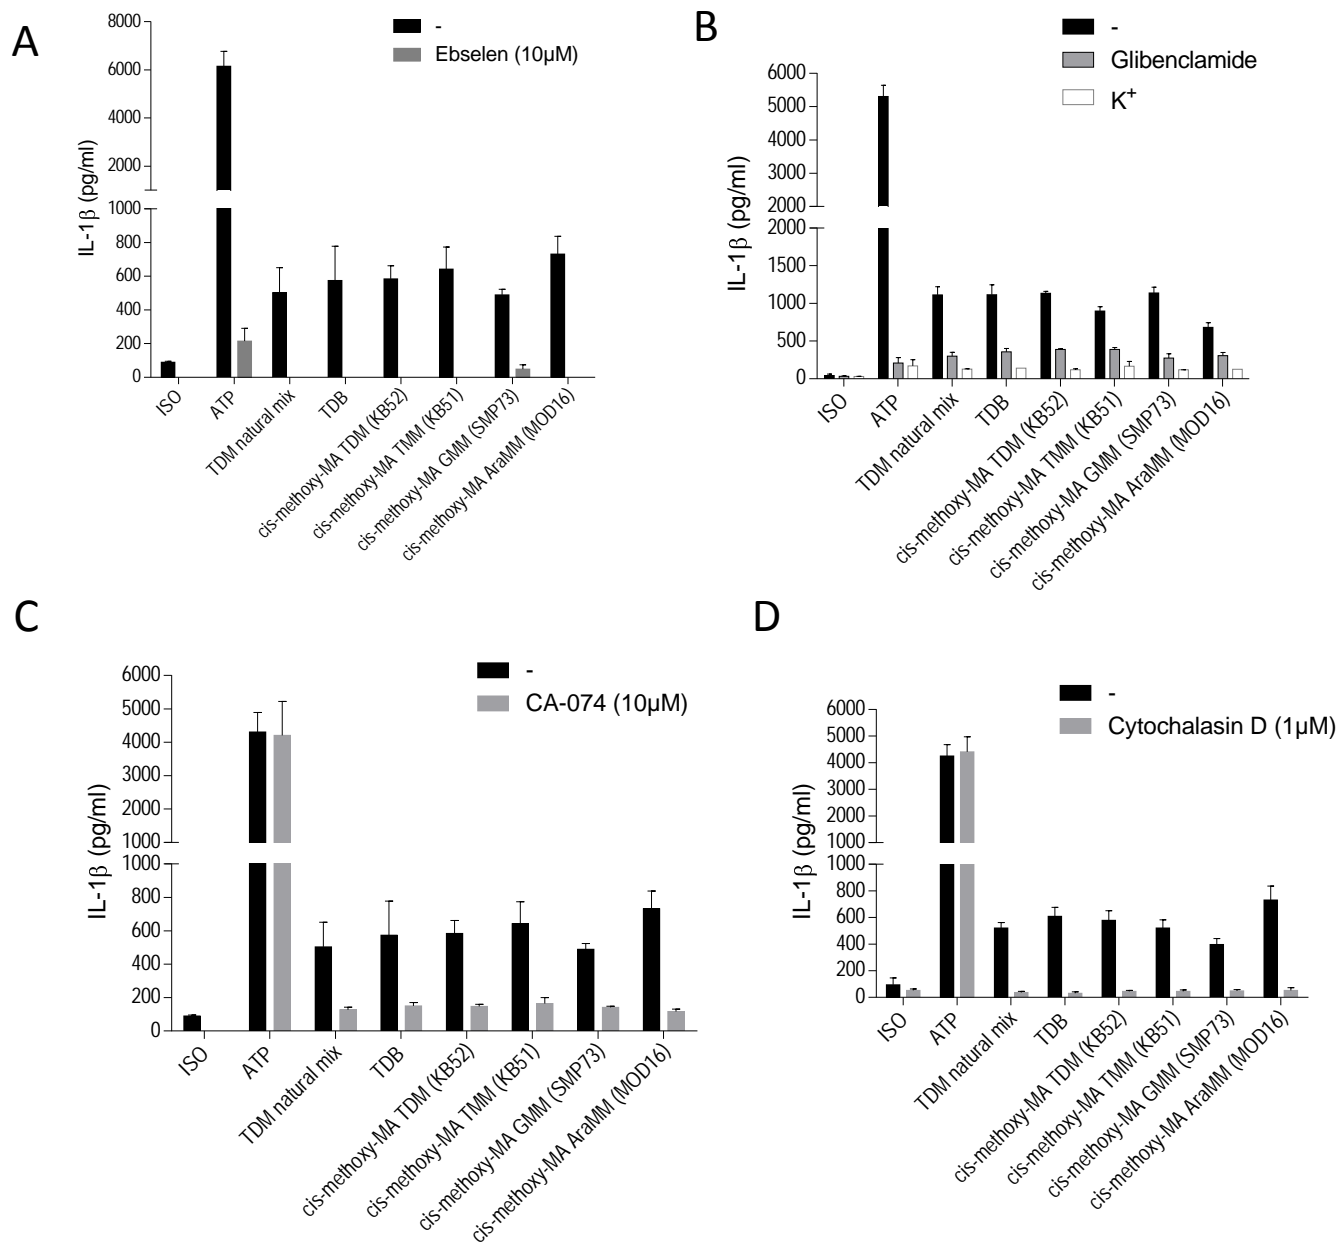

**Figure S4: mechanisms involved in the activation of inflammasome by GMM and AraMM**

Supplement: Supplementary file 1 [file 1 › JIN450955_FigS4.pdf]
